COMMENTS AND  
RESPONSES

**Response to  
Comment on: Olsson  
et al. High Levels of  
Education Are  
Associated With an  
Increased Risk of  
Latent Autoimmune  
Diabetes in Adults:  
Results From the  
Nord-Trøndelag  
Health Study.  
Diabetes Care  
2011;34:102-107**

**W**e appreciate the interest of Sawicki and Bastian (1) in our study. They propose an alternative explanation of our results, namely, that parents with a high education level would have better controlled diabetes, leading to lesser complications during pregnancy, which, in turn, would lead to stronger liability for autoimmunity in the offspring. Although such a scenario cannot be completely ruled out, we feel that it is unlikely based on the following

grounds: Firstly, an association between low social status and negative influence on pregnancy complications has been documented by the references given by Sawicki and Bastian only for parents with type 1 diabetes (2–4), and parents with type 1 diabetes constitute only a small minority of the parents of current patients with type 1 diabetes or latent autoimmune diabetes in adults. Secondly, that there exists preferential passage of autoimmunity with well-controlled versus poorly controlled diabetes from mother to child is, to our knowledge, an unproven concept. Information on educational level and on type of diabetes for some of the parents of our cases might be available by coupling our data to the Norwegian Family Registry, but there would be too few cases to answer this question properly.

LISA OLSSON, MSc<sup>1</sup>  
ANDERS AHLBOM, PhD<sup>1</sup>  
VALDEMAR GRILL, MD, PhD<sup>2,3</sup>  
KRISTIAN MIDTHJELL, MD, PhD<sup>4</sup>  
SOFIA CARLSSON, PhD<sup>1</sup>

From the <sup>1</sup>Department of Epidemiology, Institute of Environmental Medicine, Karolinska Institutet, Stockholm, Sweden; the <sup>2</sup>Department of Cancer Research and Molecular Medicine, Faculty of Medicine, The Norwegian University of Science and Technology, Trondheim, Norway; the <sup>3</sup>Department of Endocrinology, St. Olav University Hospital, Trondheim, Norway; and the <sup>4</sup>Nord-Trøndelag Health Study Research Centre, Department of Community Medicine and General

Practice, Faculty of Medicine, The Norwegian University of Science and Technology, Levanger, Norway.

Corresponding author: Lisa Olsson, lisa.olsson@ki.se.

DOI: 10.2337/dc11-0391

© 2011 by the American Diabetes Association. Readers may use this article as long as the work is properly cited, the use is educational and not for profit, and the work is not altered. See <http://creativecommons.org/licenses/by-nc-nd/3.0/> for details.

**Acknowledgments**—No potential conflicts of interest relevant to this article were reported.

**References**

1. Sawicki PT, Bastian H. Comment on: Olsson et al. High levels of education are associated with an increased risk of latent autoimmune diabetes in adults: results from the Nord-Trøndelag Health Study. *Diabetes Care* 2011;34:102–107 (Letter). *Diabetes Care* 2011;34:e113. DOI: 10.2337/dc11-0188
2. Mühlhauser I, Overmann H, Bender R, et al. Social status and the quality of care for adult people with type I (insulin-dependent) diabetes mellitus—a population-based study. *Diabetologia* 1998;41:1139–1150
3. Leguizamón G, Igarzabal ML, Reece EA. Periconceptional care of women with diabetes mellitus. *Obstet Gynecol Clin North Am* 2007;34:225–239, viii
4. Kitzmiller JL, Buchanan TA, Kjos S, Combs CA, Ratner RE. Pre-conception care of diabetes, congenital malformations, and spontaneous abortions. *Diabetes Care* 1996;19:514–541
